# Supplementary figures and images for: Stabilizing tetramethylammonium lead iodide perovskite and exploring its electronic and optical absorption for solar cell absorber application
Source: Royal Society of Chemistry journal article supplement (doi:10.1039/d3cp01823g), 2023-01-01

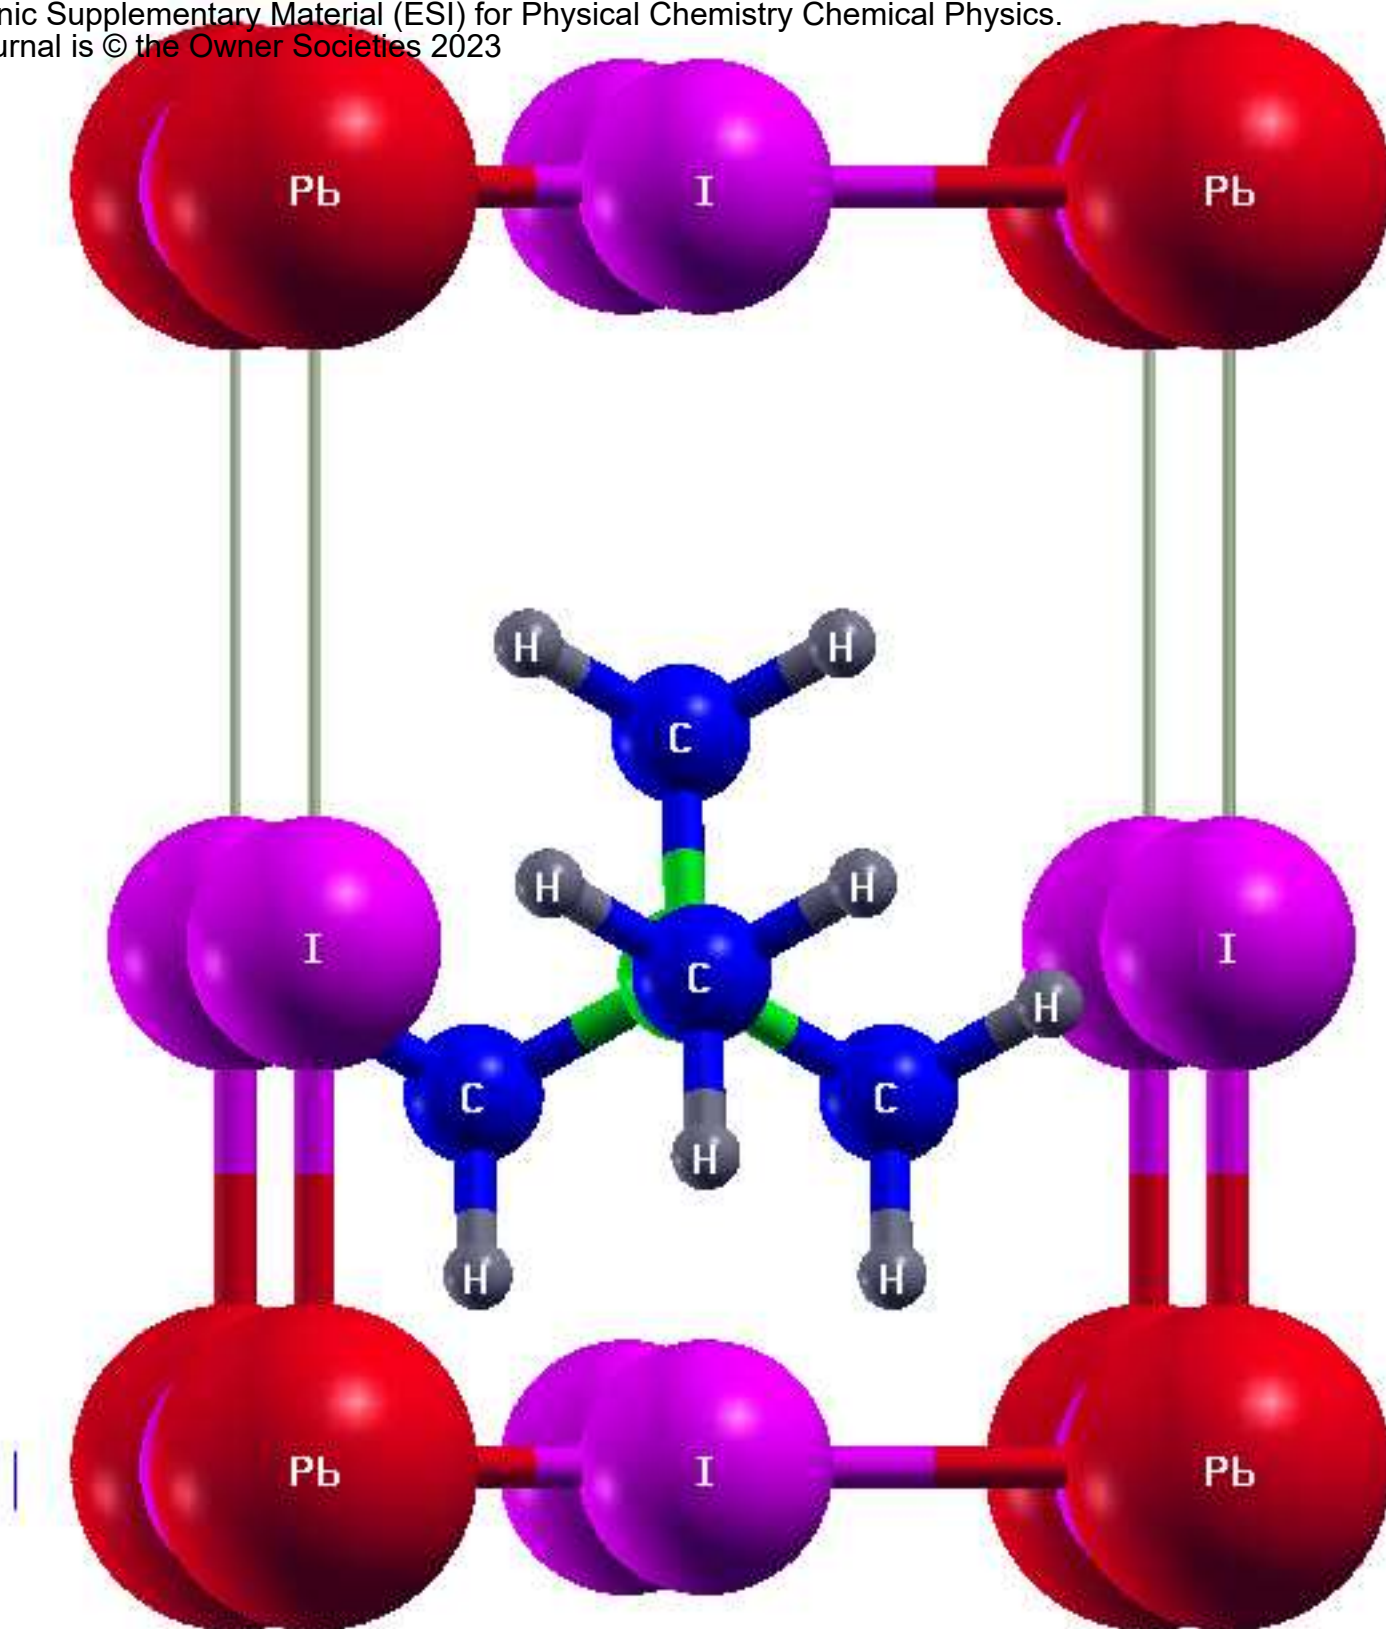

Supplement: d3cp01823g3.pdf [file d3cp01823g3.pdf]

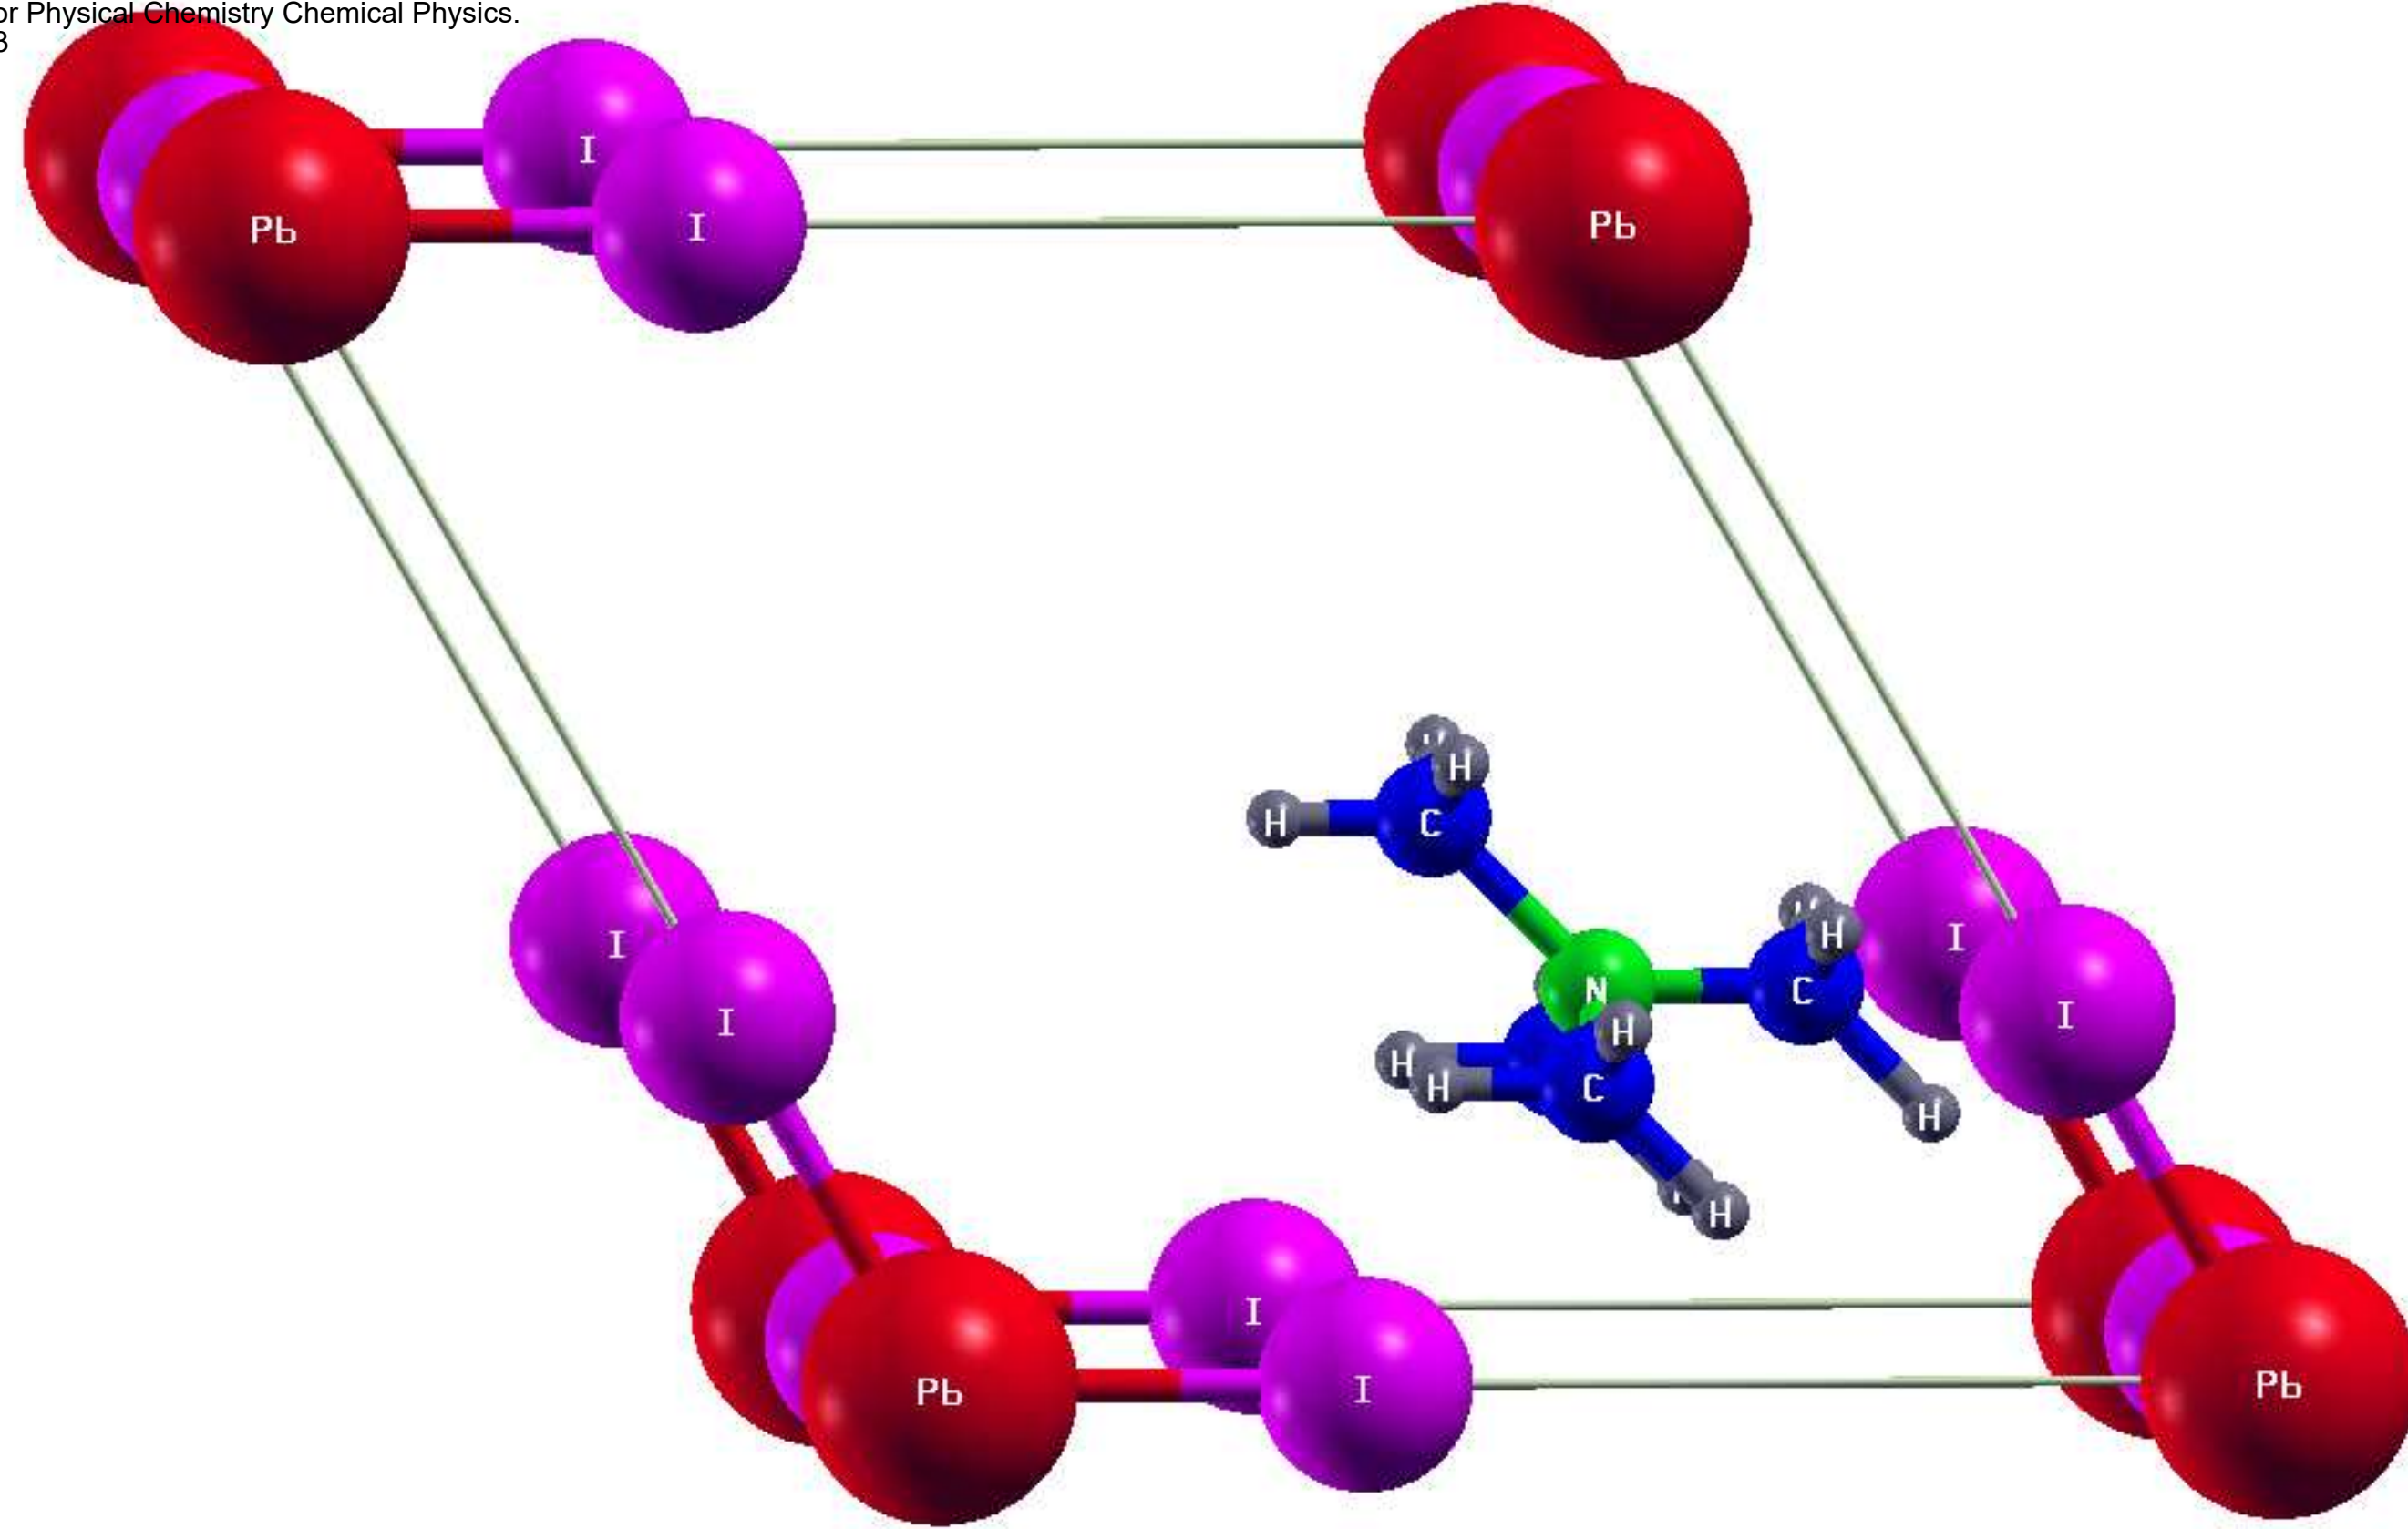

Supplement: d3cp01823g4.pdf [file d3cp01823g4.pdf]

GW PPA gap for  $(\text{CH}_4)_4\text{NH}_4\text{PbI}_3$  with SOC

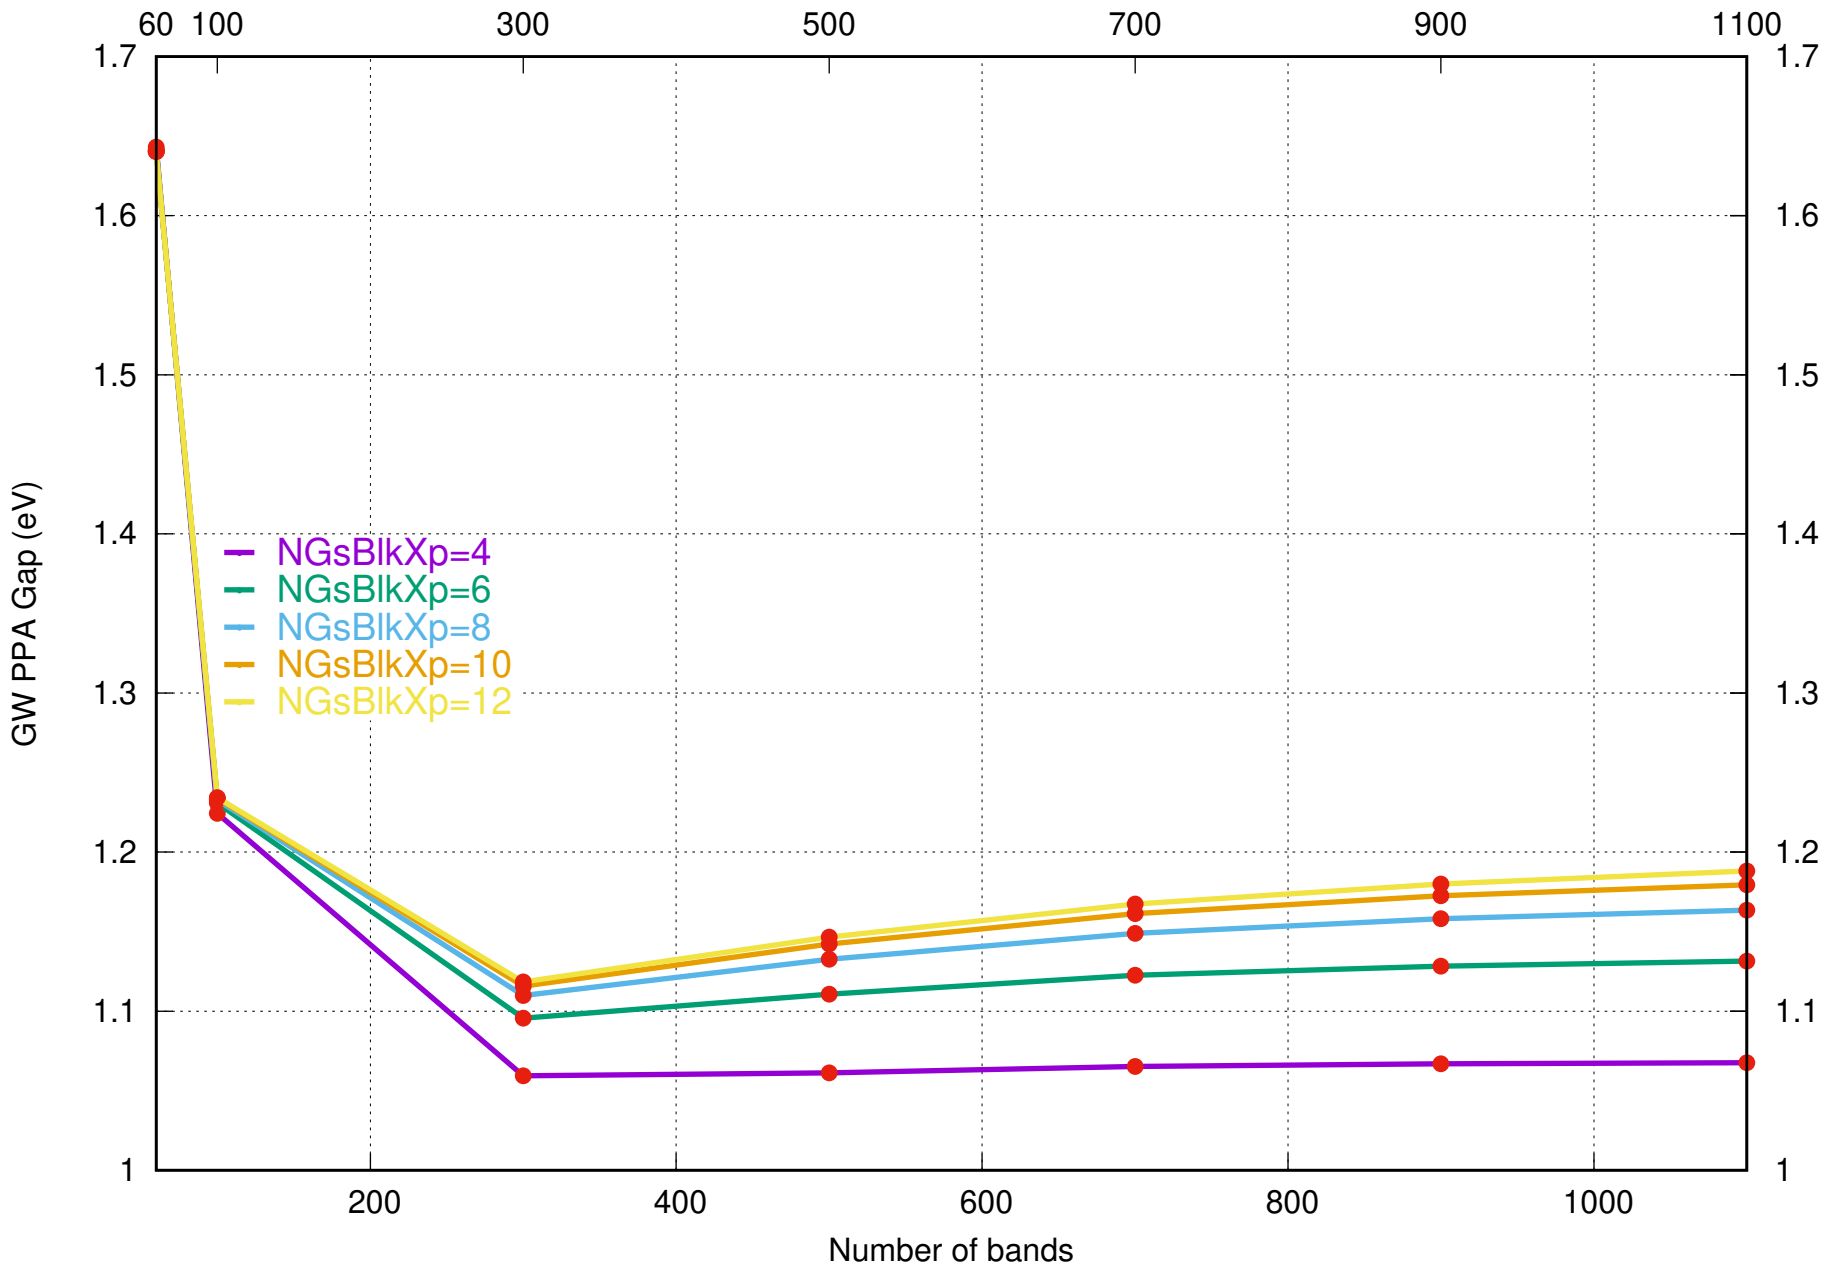

Supplement: d3cp01823g7.pdf [file d3cp01823g7.pdf]

# $(\text{CH}_3)_4\text{NPbI}_3$ Phonon Dispersion at low Frequency

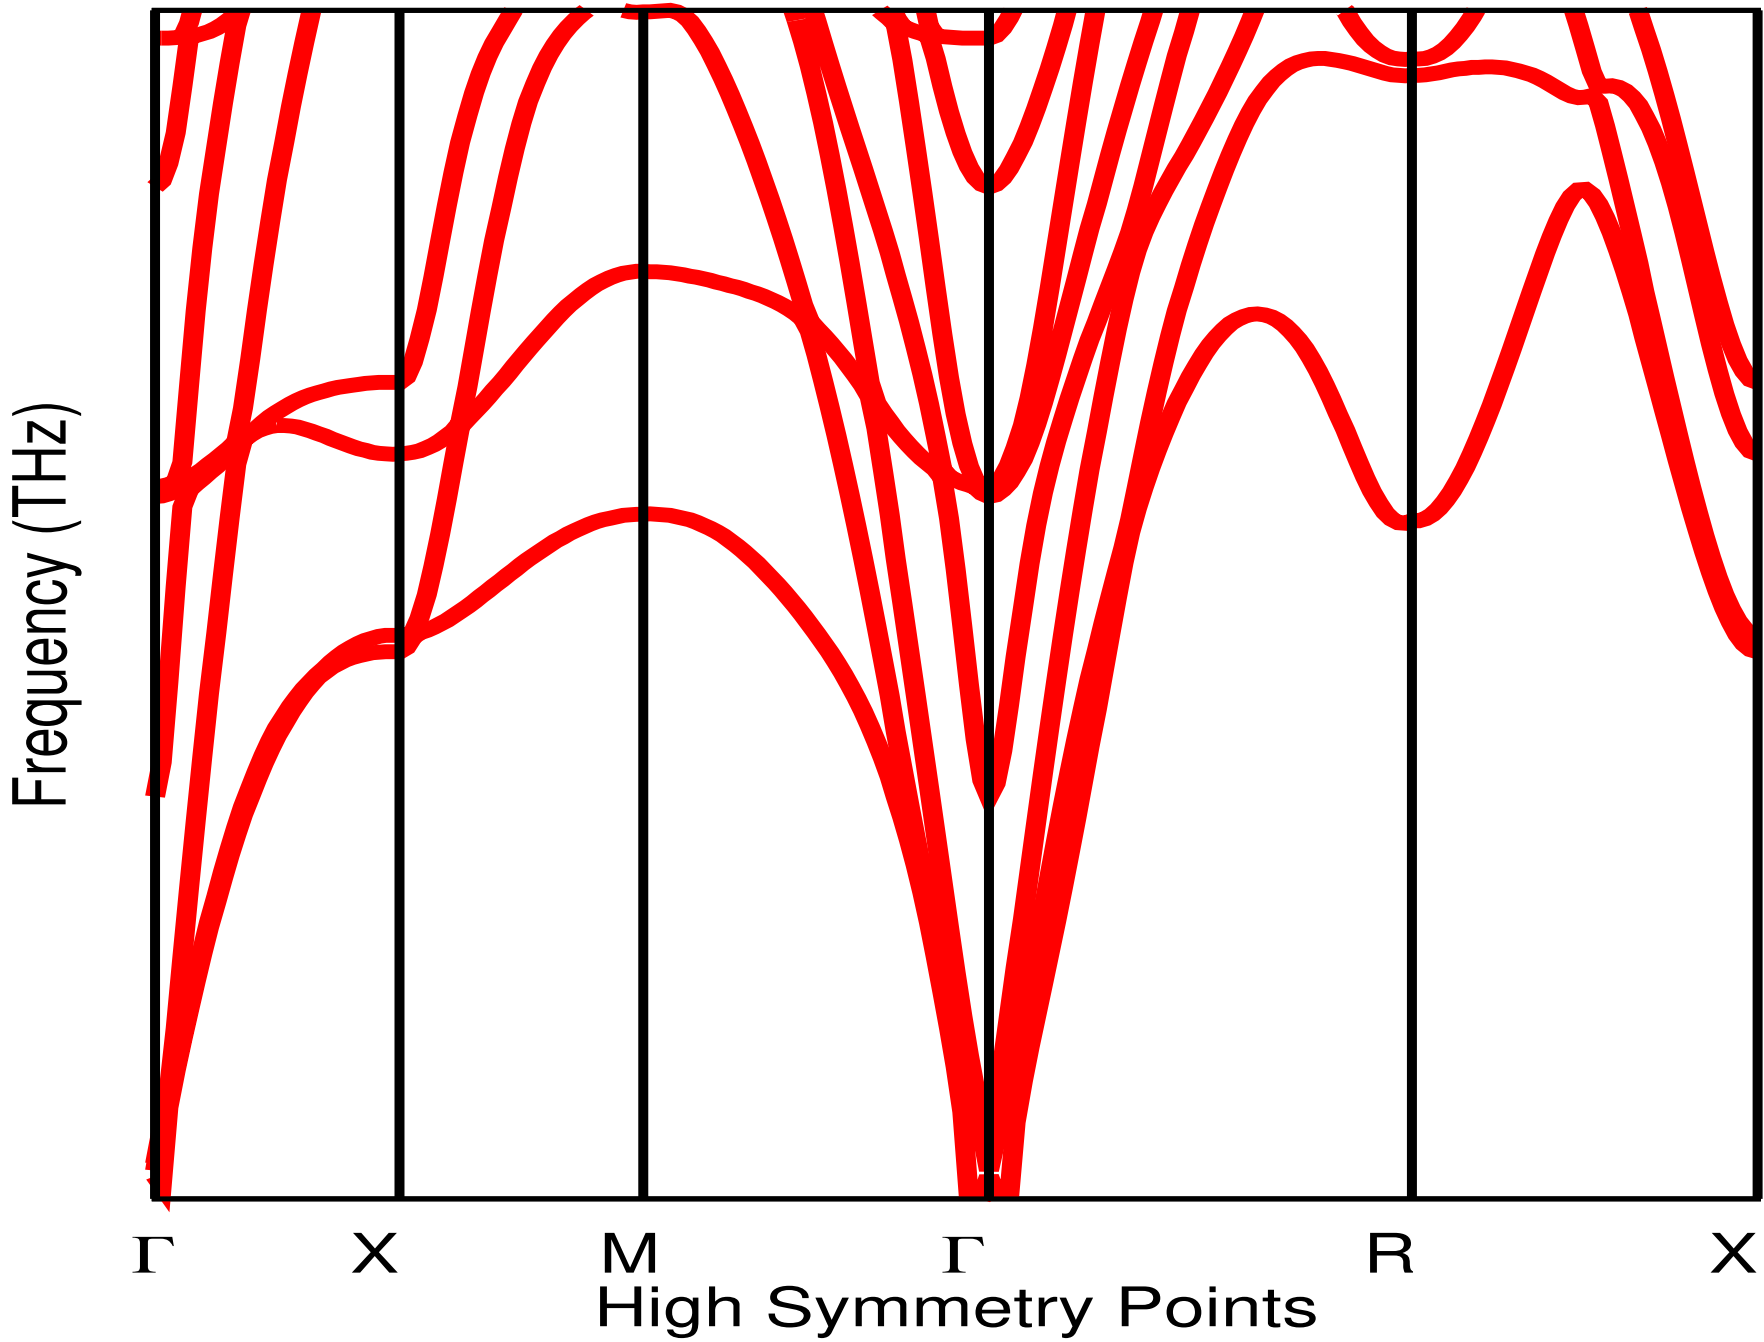

Supplement: d3cp01823g9.pdf [file d3cp01823g9.pdf]
